# Supplementary material for: IGF2BP3 Associates with Proliferative Phenotype and Prognostic Features in B-Cell Acute Lymphoblastic Leukemia
Source: PubMed Central journal article supplement (PMC8037952; doi:10.3390/cancers13071505), 2021-03-25
Supplement: cancers-13-01505-s001.pdf [file cancers-13-01505-s001.pdf]

Article

# IGF2BP3 Associates with Proliferative Phenotype and Prognostic Features in B-Cell Acute Lymphoblastic Leukemia

Artturi Mäkinen <sup>1,2,\*</sup>, Atte Nikkilä <sup>1</sup>, Teppo Haapaniemi <sup>2,3</sup>, Laura Oksa <sup>1</sup>, Juha Mehtonen <sup>4</sup>, Matti Vänskä <sup>5</sup>, Merja Heinäniemi <sup>4</sup>, Timo Paavonen <sup>2,6</sup> and Olli Lohi <sup>1,7</sup>

- <sup>1</sup> Tampere Center for Child, Adolescent and Maternal Health Research, Faculty of Medicine and Health Technology, Tampere University, 33520 Tampere, Finland; atte.nikkila@tuni.fi (A.N.); laura.oksa@tuni.fi (L.O.); olli.lohi@tuni.fi (O.L.)
  - <sup>2</sup> Fimlab Laboratories, Department of Pathology, Tampere University Hospital, 33520 Tampere, Finland; teppo.haapaniemi@fimlab.fi (T.H.); timo.paavonen@tuni.fi (T.P.)
  - <sup>3</sup> Department of Biological and Environmental Sciences, University of Jyväskylä, 40014 Jyväskylä, Finland
  - <sup>4</sup> Institute of Biomedicine, School of Medicine, University of Eastern Finland, 70211 Kuopio, Finland; juha.mehtonen@uef.fi (J.M.); merja.heinaniemi@uef.fi (M.H.)
  - <sup>5</sup> Department of Internal Medicine, Tampere University Hospital, 33520 Tampere, Finland; matti.vanska@pshp.fi
  - <sup>6</sup> Department of Pathology, Faculty of Medicine and Health Technology, Tampere University, 33520 Tampere, Finland
  - <sup>7</sup> Tays Cancer Centre, Tampere University Hospital, 33520 Tampere, Finland
- \* Correspondence: artturi.makinen@tuni.fi

**Citation:** Mäkinen, A.; Nikkilä, A.; Haapaniemi, T.; Oksa, L.; Mehtonen, J.; Vänskä, M.; Heinäniemi, M.; Paavonen, T.; Lohi, O. IGF2BP3 Associates with Proliferative Phenotype and Prognostic Features in B-Cell Acute Lymphoblastic Leukemia. *Cancers* **2021**, *13*, 1505. <https://doi.org/10.3390/cancers13071505>.

Academic Editor: Ajay Pratap Singh

Received: 13 February 2021

Accepted: 22 March 2021

Published: 25 March 2021

**Publisher's Note:** MDPI stays neutral with regard to jurisdictional claims in published maps and institutional affiliations.

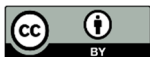

**Copyright:** © 2021 by the authors. Licensee MDPI, Basel, Switzerland. This article is an open access article distributed under the terms and conditions of the Creative Commons Attribution (CC BY) license (<http://creativecommons.org/licenses/by/4.0/>).

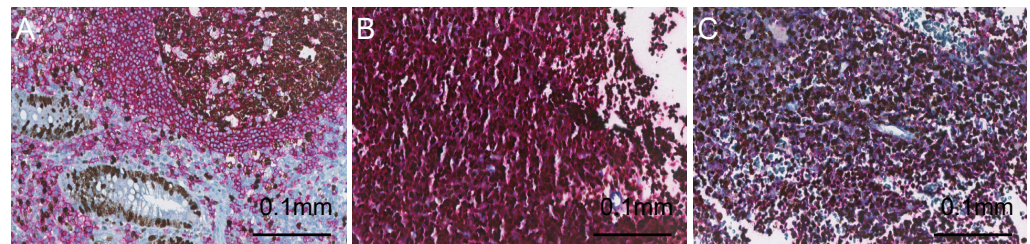

**Figure S1.** Immunohistochemical co-staining of CD19 and Ki-67 in B-ALL. (A) CD19 (red) and Ki-67 (brown) in the appendix show a high expression of Ki-67 in the germinal center (upper right) and crypt epithelium (lower left; 200X magnification). (B) Co-staining of CD19 and Ki-67 in the B-ALL case with a high proportion of blasts showing positivity to nuclear Ki-67 staining. (C) B-ALL case showing partial expression of the nuclear Ki-67 protein (200X magnification).

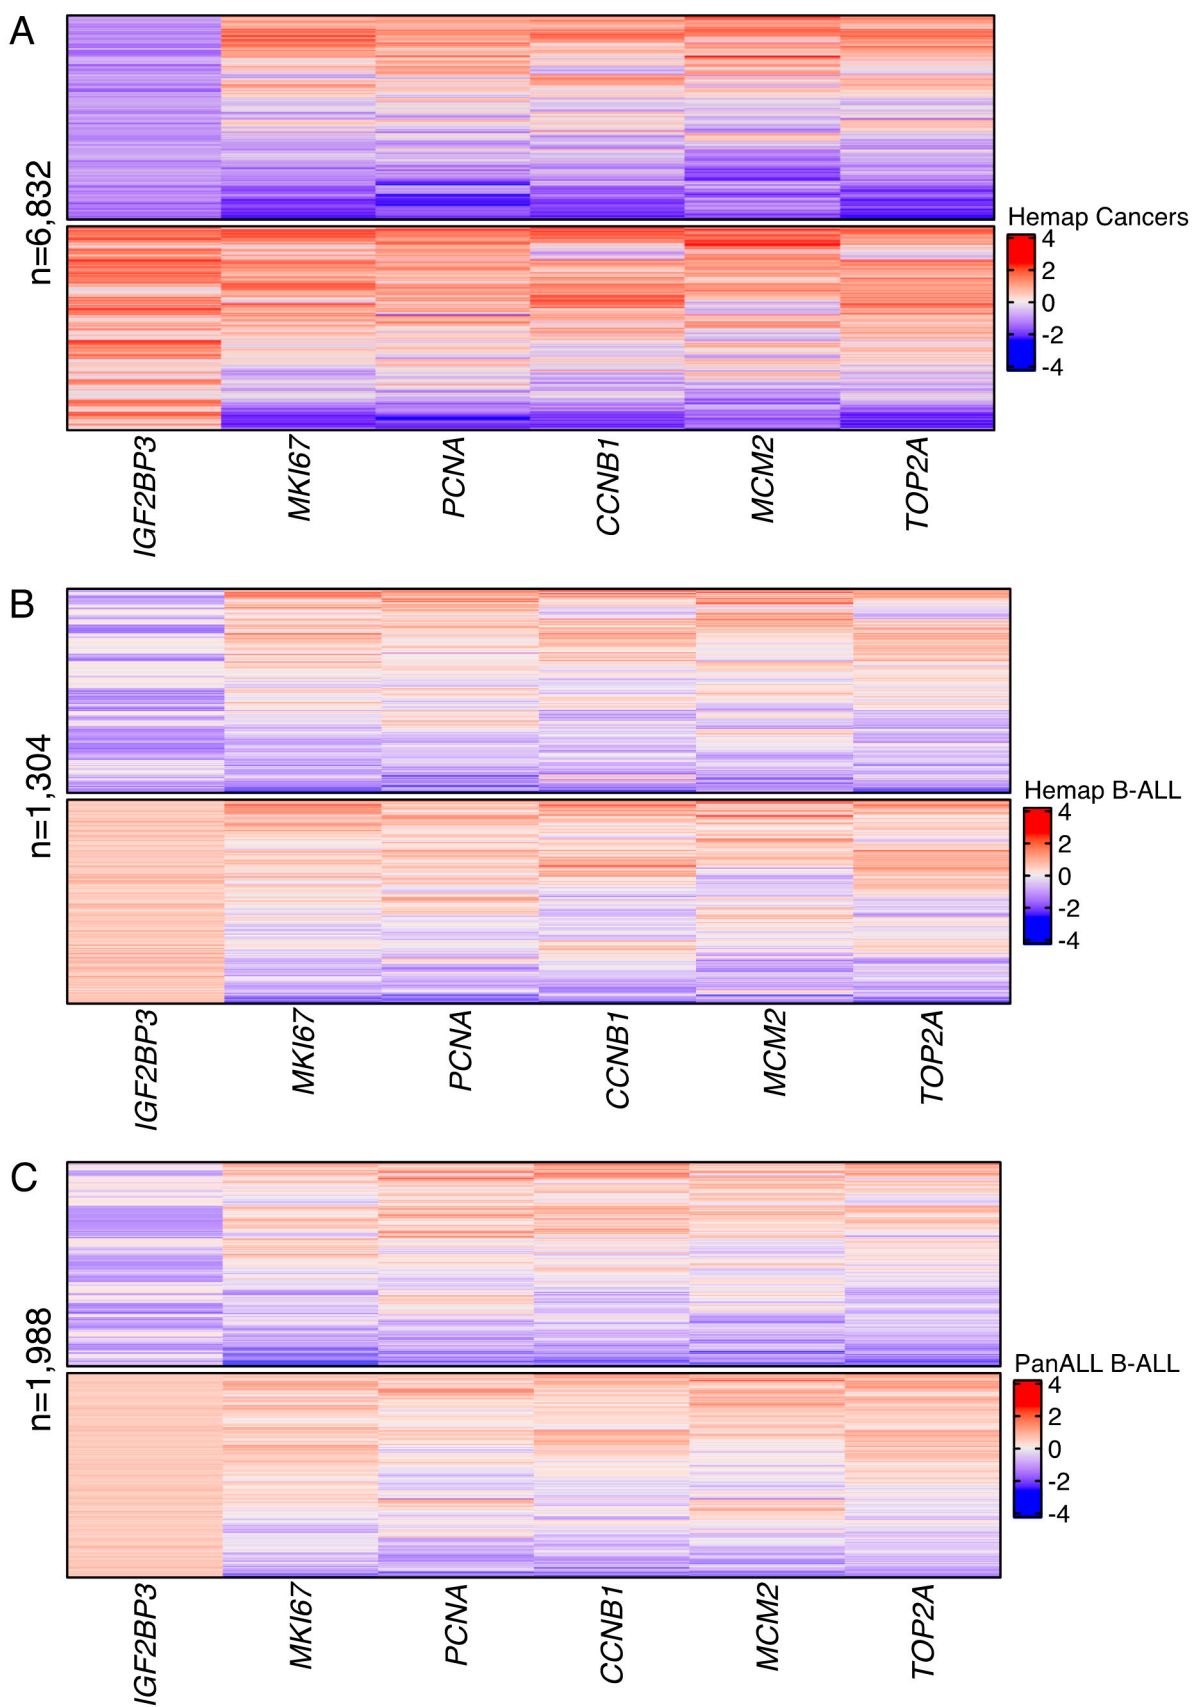

**Figure S2.** Heatmap illustration of the expression of proliferation-associated genes (*MKI67*, *PCNA*, *CCNB1*, *MCM2*, and *TOP2A*) in cases with either a high or low expression of *IGF2BP3* [29]. (A) Heatmap illustrations using (A) all hematological cancers or (B) B-ALL from the Hemap data set [24,25], and (C) B-ALL cases from the PanALL data set [26].

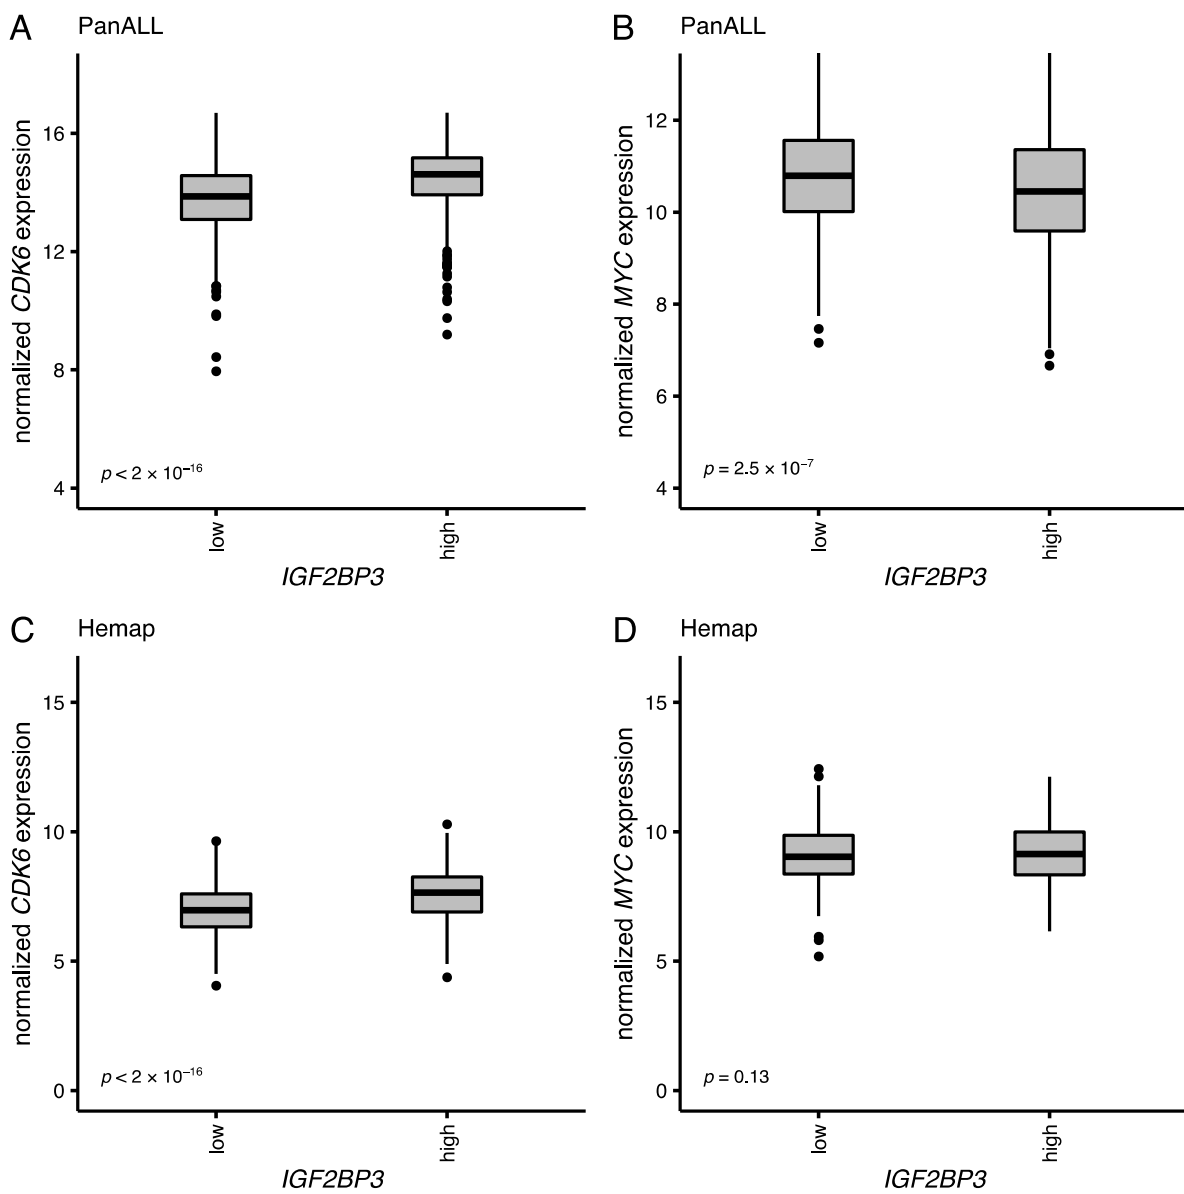

**Figure S3.** Boxplots showing expression of *CDK6* and *MYC* in cases with either a low or high expression of *IGF2BP3* in B-ALL for both of the data sets: (A,B) PanALL data set and (C,D) Hemap data set [24–26]. Dots represent outliers. The  $p$ -values of the Mann–Whitney U tests between groups are shown.
